# Supplementary material for: Measuring walking impairment in patients with intermittent claudication: psychometric properties of the Walking Estimated-Limitation Calculated by History (WELCH) questionnaire
Source: PeerJ. 2021 Aug 26;9:e12039. doi: 10.7717/peerj.12039 (PMC8415277; doi:10.7717/peerj.12039)
Supplement: Supplemental Information 4 [file peerj-09-12039-s004.pdf]

**Für jede der folgenden drei Fragen sollten Sie nur eine Antwort (von den 8 möglichen Antwortmöglichkeiten) auswählen.**

Wie lange können Sie ohne Unterbrechung auf ebener Strecke laufen (oder glauben Sie, dass Sie könnten):

|                                                                                                                                        | gar<br>nicht             | 30<br>Sekunden           | 1<br>Minute              | 3<br>Minuten             | 10<br>Minuten            | 30<br>Minuten            | 1<br>Stunde              | 3 Stunden<br>& mehr      |
|----------------------------------------------------------------------------------------------------------------------------------------|--------------------------|--------------------------|--------------------------|--------------------------|--------------------------|--------------------------|--------------------------|--------------------------|
| Wenn Sie langsam gehen?<br>(Langsamer als Ihre Familie,<br>Freunde oder Gleichaltrige)                                                 | <input type="checkbox"/> |
| Wenn Sie mit mittlerer<br>Geschwindigkeit gehen? (Mit<br>derselben Geschwindigkeit<br>wie Ihre Familie,<br>Freunde oder Gleichaltrige) | <input type="checkbox"/> |
| Wenn Sie schnell gehen?<br>(Schneller als Ihre Familie,<br>Freunde oder Gleichaltrige)                                                 | <input type="checkbox"/> |

**Zur Beantwortung der folgenden Frage sollten Sie nur eine Antwortmöglichkeit auswählen.**

Im Vergleich zur durchschnittlichen Gehgeschwindigkeit von Ihren Verwandten, Freunden und Menschen in Ihrem Alter, gehen Sie in der Regel ...

- ☐ ... viel langsamer
- ☐ ... langsamer
- ☐ ... ein wenig langsamer
- ☐ ... mit der gleichen Geschwindigkeit
- ☐ ... schneller
